# Supplementary material
Source: MDPI journal article supplement (https://www.mdpi.com/2073-4433/14/6/931)
Supplement: s1 [file s1 › atmosphere-2338903-supplementary.pdf]

# Supplementary Materials:

Eduardo P. Olaguer <sup>1,\*</sup>

There is a typographical error in the Supplementary Material of Olaguer (2021) [1], referred to as reference [1] below. Equation (86) should have been written as follows:

$$c_0 = \gamma\{1 + (D_{NO} + l_1[OH])\Delta t\}^2[NO]^2 + \{1 + (D_{NO} + l_1[OH])\Delta t\}[NO]([O_3]_0 + \lambda\gamma) - \mu\lambda\{1 + (D_{NO_2} + l_2[OH] + 2m_2)\Delta t\}[NO_2]. \quad (S1)$$

This typographical correction does not affect the validity of the results of Olaguer (2021) [1]. Equation (S1) was obtained by substituting expressions for  $[NO]_1$  and  $[NO_2]_1$  derived from equations (16) and (17) of reference [1] into equations (26) and (27), and then applying equation (83).

## References

1. Olaguer, E.P. The potential ozone impacts of landfills. *Atmosphere* **2021**, *12*, 877. <https://doi.org/10.3390/atmos12070877>
